# Supplementary material for: WITHDRAWN: Transcriptional regulation of miR-483-3p mediated by IL-6/STAT3 axis promoted epithelial-mesenchymal transition and tumor stemness in glioma
Source: publisher site journal article supplement (doi:10.18632/aging.103761), 2020-11-04
Supplement: Supplementary file 1 [file aging-v12-103761-supplementary-material-SD1.xlsx]

## Sheet: TargetScan7
Supplementary Table 1. Target Scan predicted the target genes of miR-483-3p.
Target gene	Representative transcript	Gene name	3P-seq tags + 5	Conserved sites total	Conserved 8mer sites	Conserved 7mer-m8 sites	Conserved 7mer-A1 sites	Poorly conserved sites total	Poorly conserved 8mer sites	Poorly conserved 7mer-m8 sites	Poorly conserved 7mer-A1 sites	6mer sites	Representative miRNA	Cumulative weighted context++ score	Total context++ score	Aggregate PCT	Previous TargetScan publication(s)
LCMT2	ENST00000567039.1	leucine carboxyl methyltransferase 2	274	1	0	1	0	1	1	0	0	1	hsa-miR-483-3p.1	-0.84	-0.9	N/A
DAD1	ENST00000250498.4	defender against cell death 1	1191	1	1	0	0	0	0	0	0	0	hsa-miR-483-3p.1	-0.8	-0.8	N/A
RAMP2	ENST00000588576.1	receptor (G protein-coupled) activity modifying protein 2	47	1	1	0	0	0	0	0	0	0	hsa-miR-483-3p.1	-0.72	-0.72	N/A
SS18L2	ENST00000447630.1	synovial sarcoma translocation gene on chromosome 18-like 2	137	1	1	0	0	0	0	0	0	0	hsa-miR-483-3p.1	-0.7	-0.77	N/A
NHP2	ENST00000314397.4	NHP2 ribonucleoprotein	77	1	1	0	0	0	0	0	0	0	hsa-miR-483-3p.1	-0.67	-0.67	N/A
TSPAN3	ENST00000267970.4	tetraspanin 3	9328	1	1	0	0	1	1	0	0	1	hsa-miR-483-3p.1	-0.57	-1	N/A
FGFR2	ENST00000369061.4	fibroblast growth factor receptor 2	75	1	1	0	0	0	0	0	0	1	hsa-miR-483-3p.1	-0.56	-0.56	N/A
HELLS	ENST00000394036.1	helicase, lymphoid-specific	329	1	1	0	0	1	0	1	0	1	hsa-miR-483-3p.1	-0.55	-0.55	N/A
TGIF2LY	ENST00000321217.4	TGFB-induced factor homeobox 2-like, Y-linked	5	1	1	0	0	0	0	0	0	1	hsa-miR-483-3p.1	-0.54	-0.56	N/A
FBXO28	ENST00000424254.2	F-box protein 28	461	2	0	2	0	0	0	0	0	0	hsa-miR-483-3p.1	-0.49	-0.49	N/A
NRG1	ENST00000341377.5	neuregulin 1	113	1	1	0	0	1	0	1	0	2	hsa-miR-483-3p.1	-0.48	-0.49	N/A
ISM2	ENST00000493585.1	isthmin 2	7	2	1	0	1	0	0	0	0	0	hsa-miR-483-3p.1	-0.47	-0.47	N/A
UQCRQ	ENST00000378670.3	ubiquinol-cytochrome c reductase, complex III subunit VII, 9.5kDa	13502	1	0	1	0	0	0	0	0	0	hsa-miR-483-3p.1	-0.45	-0.46	N/A
PIP4K2C	ENST00000354947.5	phosphatidylinositol-5-phosphate 4-kinase, type II, gamma	457	1	0	1	0	1	1	0	0	0	hsa-miR-483-3p.1	-0.43	-0.45	N/A
GPC2	ENST00000292377.2	glypican 2	52	1	0	1	0	1	0	1	0	0	hsa-miR-483-3p.1	-0.42	-0.42	N/A
VPS54	ENST00000409558.4	vacuolar protein sorting 54 homolog (S. cerevisiae)	312	1	1	0	0	0	0	0	0	0	hsa-miR-483-3p.1	-0.41	-0.41	N/A
SLC18A1	ENST00000437980.1	solute carrier family 18 (vesicular monoamine transporter), member 1	5	1	1	0	0	0	0	0	0	0	hsa-miR-483-3p.1	-0.41	-0.41	N/A
NPFFR1	ENST00000277942.6	neuropeptide FF receptor 1	5	1	1	0	0	3	1	2	0	3	hsa-miR-483-3p.1	-0.41	-0.41	N/A
NUP62CL	ENST00000372461.3	nucleoporin 62kDa C-terminal like	73	1	0	1	0	1	0	0	1	0	hsa-miR-483-3p.1	-0.39	-0.5	N/A
SEMA3A	ENST00000265362.4	sema domain, immunoglobulin domain (Ig), short basic domain, secreted, (semaphorin) 3A	162	1	1	0	0	0	0	0	0	1	hsa-miR-483-3p.1	-0.39	-0.41	N/A
RPE	ENST00000429907.1	ribulose-5-phosphate-3-epimerase	333	1	0	1	0	1	0	0	1	1	hsa-miR-483-3p.1	-0.38	-0.45	N/A
STAT1	ENST00000540176.1	signal transducer and activator of transcription 1, 91kDa	326	1	0	1	0	2	0	1	1	0	hsa-miR-483-3p.1	-0.37	-0.38	N/A
TIFAB	ENST00000537858.1	TRAF-interacting protein with forkhead-associated domain, family member B	5	1	1	0	0	0	0	0	0	4	hsa-miR-483-3p.1	-0.37	-0.37	N/A
UPF3B	ENST00000276201.2	UPF3 regulator of nonsense transcripts homolog B (yeast)	11	1	1	0	0	0	0	0	0	1	hsa-miR-483-3p.1	-0.35	-0.35	N/A
PMEPA1	ENST00000341744.3	prostate transmembrane protein, androgen induced 1	736	1	0	0	1	1	0	1	0	0	hsa-miR-483-3p.1	-0.35	-0.35	N/A
AGPAT4	ENST00000366911.5	1-acylglycerol-3-phosphate O-acyltransferase 4	142	1	1	0	0	1	0	1	0	1	hsa-miR-483-3p.1	-0.33	-0.34	N/A
ZBTB12	ENST00000375527.2	zinc finger and BTB domain containing 12	18	1	1	0	0	1	0	1	0	1	hsa-miR-483-3p.1	-0.33	-0.55	N/A
DCTN3	ENST00000447983.2	dynactin 3 (p22)	1816	1	0	1	0	1	0	1	0	0	hsa-miR-483-3p.1	-0.33	-0.33	N/A
SEC14L2	ENST00000312932.9	SEC14-like 2 (S. cerevisiae)	187	1	1	0	0	0	0	0	0	2	hsa-miR-483-3p.1	-0.33	-0.39	N/A
CTNNB1	ENST00000349496.5	catenin (cadherin-associated protein), beta 1, 88kDa	7257	1	1	0	0	0	0	0	0	0	hsa-miR-483-3p.1	-0.33	-0.33	N/A
LBH	ENST00000406087.1	limb bud and heart development	1956	1	0	1	0	1	0	0	1	0	hsa-miR-483-3p.1	-0.32	-0.33	N/A
CPD	ENST00000225719.4	carboxypeptidase D	1766	1	1	0	0	0	0	0	0	0	hsa-miR-483-3p.1	-0.31	-0.32	N/A
SLC6A6	ENST00000454876.2	solute carrier family 6 (neurotransmitter transporter), member 6	280	1	0	1	0	1	1	0	0	1	hsa-miR-483-3p.1	-0.31	-0.33	N/A
MSL2	ENST00000309993.2	male-specific lethal 2 homolog (Drosophila)	175	1	1	0	0	1	0	0	1	1	hsa-miR-483-3p.1	-0.31	-0.36	N/A
AC174470.1	ENST00000457257.1		164	1	1	0	0	0	0	0	0	0	hsa-miR-483-3p.1	-0.31	-0.31	N/A
CTDSPL2	ENST00000260327.4	CTD (carboxy-terminal domain, RNA polymerase II, polypeptide A) small phosphatase like 2	457	1	1	0	0	0	0	0	0	0	hsa-miR-483-3p.1	-0.31	-0.34	N/A
GAP43	ENST00000305124.6	growth associated protein 43	5	1	0	1	0	0	0	0	0	0	hsa-miR-483-3p.1	-0.3	-0.3	N/A
PAM	ENST00000438793.3	peptidylglycine alpha-amidating monooxygenase	17149	1	0	1	0	1	0	1	0	0	hsa-miR-483-3p.1	-0.3	-0.43	N/A
IQSEC2	ENST00000375365.2	IQ motif and Sec7 domain 2	5	1	1	0	0	0	0	0	0	0	hsa-miR-483-3p.1	-0.29	-0.29	N/A
U2AF2	ENST00000450554.2	U2 small nuclear RNA auxiliary factor 2	1093	1	0	1	0	0	0	0	0	0	hsa-miR-483-3p.1	-0.29	-0.29	N/A
HM13	ENST00000335574.5	histocompatibility (minor) 13	4848	1	0	1	0	1	0	0	1	1	hsa-miR-483-3p.1	-0.29	-0.33	N/A
RPS24	ENST00000435275.1	ribosomal protein S24	39029	1	0	0	1	0	0	0	0	0	hsa-miR-483-3p.1	-0.28	-0.28	N/A
HSH2D	ENST00000588246.1	hematopoietic SH2 domain containing	5	1	1	0	0	0	0	0	0	3	hsa-miR-483-3p.1	-0.28	-0.28	N/A
DBN1	ENST00000512501.1	drebrin 1	9937	1	0	1	0	0	0	0	0	0	hsa-miR-483-3p.1	-0.28	-0.28	N/A
CNOT7	ENST00000361272.4	CCR4-NOT transcription complex, subunit 7	415	1	0	1	0	0	0	0	0	1	hsa-miR-483-3p.1	-0.27	-0.27	N/A
MEX3C	ENST00000592416.1	mex-3 RNA binding family member C	5	1	0	0	1	1	0	1	0	1	hsa-miR-483-3p.1	-0.27	-0.27	N/A
PCBD2	ENST00000512783.1	pterin-4 alpha-carbinolamine dehydratase/dimerization cofactor of hepatocyte nuclear factor 1 alpha (TCF1) 2	95	1	0	1	0	0	0	0	0	3	hsa-miR-483-3p.1	-0.26	-0.26	N/A
FBXO24	ENST00000360609.2	F-box protein 24	19	1	1	0	0	0	0	0	0	0	hsa-miR-483-3p.1	-0.26	-0.26	N/A
IL23R	ENST00000371002.1	interleukin 23 receptor	5	1	0	1	0	0	0	0	0	1	hsa-miR-483-3p.1	-0.25	-0.25	N/A
RGAG4	ENST00000545866.1	retrotransposon gag domain containing 4	34	1	0	1	0	0	0	0	0	0	hsa-miR-483-3p.1	-0.25	-0.25	N/A
CHSY3	ENST00000305031.4	chondroitin sulfate synthase 3	221	1	0	1	0	1	0	0	1	0	hsa-miR-483-3p.1	-0.25	-0.3	N/A
RNF32	ENST00000311822.8	ring finger protein 32	15	1	0	1	0	0	0	0	0	0	hsa-miR-483-3p.1	-0.25	-0.25	N/A
CDK4	ENST00000312990.6	cyclin-dependent kinase 4	290	1	0	1	0	0	0	0	0	1	hsa-miR-483-3p.1	-0.25	-0.26	N/A
RNF24	ENST00000336095.6	ring finger protein 24	448	1	0	1	0	0	0	0	0	2	hsa-miR-483-3p.1	-0.25	-0.25	N/A
CYP3A5	ENST00000339843.2	cytochrome P450, family 3, subfamily A, polypeptide 5	5	1	0	1	0	0	0	0	0	0	hsa-miR-483-3p.1	-0.24	-0.24	N/A
NDOR1	ENST00000427047.2	NADPH dependent diflavin oxidoreductase 1	1044	2	0	2	0	0	0	0	0	0	hsa-miR-483-3p.1	-0.24	-0.27	N/A
KLF7	ENST00000423015.1	Kruppel-like factor 7 (ubiquitous)	737	2	1	1	0	0	0	0	0	2	hsa-miR-483-3p.1	-0.23	-0.24	N/A
TAL1	ENST00000371884.2	T-cell acute lymphocytic leukemia 1	5	1	1	0	0	0	0	0	0	0	hsa-miR-483-3p.1	-0.23	-0.23	N/A
C5orf20	ENST00000503143.2	chromosome 5 open reading frame 20	5	1	1	0	0	0	0	0	0	1	hsa-miR-483-3p.1	-0.23	-0.23	N/A
ZBTB4	ENST00000380599.4	zinc finger and BTB domain containing 4	1039	1	0	1	0	1	0	1	0	0	hsa-miR-483-3p.1	-0.23	-0.23	N/A
SDF4	ENST00000263741.7	stromal cell derived factor 4	2036	1	0	1	0	0	0	0	0	0	hsa-miR-483-3p.1	-0.23	-0.23	N/A
DIP2B	ENST00000301180.5	DIP2 disco-interacting protein 2 homolog B (Drosophila)	1613	1	0	1	0	1	0	1	0	0	hsa-miR-483-3p.1	-0.22	-0.23	N/A
BBC3	ENST00000341983.4	BCL2 binding component 3	87	1	0	1	0	0	0	0	0	0	hsa-miR-483-3p.1	-0.22	-0.22	N/A
MDM4	ENST00000391947.2	Mdm4 p53 binding protein homolog (mouse)	443	1	0	1	0	0	0	0	0	2	hsa-miR-483-3p.1	-0.22	-0.22	N/A
CDK20	ENST00000375871.4	cyclin-dependent kinase 20	25	1	0	1	0	0	0	0	0	0	hsa-miR-483-3p.1	-0.21	-0.21	N/A
DDX6	ENST00000264018.4	DEAD (Asp-Glu-Ala-Asp) box helicase 6	11	1	0	1	0	1	0	1	0	1	hsa-miR-483-3p.1	-0.21	-0.25	N/A
RCAN2	ENST00000330430.6	regulator of calcineurin 2	32	1	0	1	0	0	0	0	0	0	hsa-miR-483-3p.1	-0.2	-0.2	N/A
ZNF449	ENST00000339249.4	zinc finger protein 449	345	1	0	1	0	0	0	0	0	0	hsa-miR-483-3p.1	-0.2	-0.21	N/A
ABCA9	ENST00000370732.2	ATP-binding cassette, sub-family A (ABC1), member 9	5	1	1	0	0	0	0	0	0	0	hsa-miR-483-3p.1	-0.2	-0.2	N/A
MYO18A	ENST00000354329.4	myosin XVIIIA	159	1	0	1	0	1	0	1	0	0	hsa-miR-483-3p.1	-0.2	-0.22	N/A
AAED1	ENST00000375234.3	AhpC/TSA antioxidant enzyme domain containing 1	5	1	0	1	0	0	0	0	0	0	hsa-miR-483-3p.1	-0.2	-0.2	N/A
ABHD14B	ENST00000461108.1	abhydrolase domain containing 14B	189	1	0	1	0	0	0	0	0	0	hsa-miR-483-3p.1	-0.19	-0.19	N/A
ZCCHC24	ENST00000372336.3	zinc finger, CCHC domain containing 24	359	1	0	1	0	0	0	0	0	0	hsa-miR-483-3p.1	-0.19	-0.19	N/A
S100A2	ENST00000368707.4	S100 calcium binding protein A2	1140	1	0	0	1	0	0	0	0	0	hsa-miR-483-3p.1	-0.18	-0.18	N/A
AEBP2	ENST00000266508.9	AE binding protein 2	1228	1	0	1	0	0	0	0	0	1	hsa-miR-483-3p.1	-0.18	-0.2	N/A
LUC7L	ENST00000337351.4	LUC7-like (S. cerevisiae)	898	1	0	1	0	1	0	0	1	3	hsa-miR-483-3p.1	-0.18	-0.19	N/A
HNRNPA3	ENST00000411529.2	heterogeneous nuclear ribonucleoprotein A3	329	1	0	1	0	0	0	0	0	0	hsa-miR-483-3p.1	-0.17	-0.17	N/A
TENM3	ENST00000511685.1	teneurin transmembrane protein 3	30	1	0	1	0	0	0	0	0	0	hsa-miR-483-3p.1	-0.17	-0.17	N/A
LRRC8C	ENST00000370454.4	leucine rich repeat containing 8 family, member C	544	1	0	0	1	0	0	0	0	1	hsa-miR-483-3p.1	-0.17	-0.17	N/A
PEG10	ENST00000482108.1	paternally expressed 10	8778	1	0	1	0	0	0	0	0	0	hsa-miR-483-3p.1	-0.17	-0.17	N/A
TNPO3	ENST00000393245.1	transportin 3	30	1	0	1	0	2	1	1	0	3	hsa-miR-483-3p.1	-0.17	-0.25	N/A
FOSL2	ENST00000379619.1	FOS-like antigen 2	2255	1	1	0	0	2*	0	0	1	4	hsa-miR-483-3p.1	-0.17	-0.34	N/A
AAK1	ENST00000409085.4	AP2 associated kinase 1	27	1	0	1	0	4	1	1	2	5	hsa-miR-483-3p.1	-0.16	-0.24	N/A
NRGN	ENST00000412681.2	neurogranin (protein kinase C substrate, RC3)	60	1	0	1	0	0	0	0	0	0	hsa-miR-483-3p.1	-0.16	-0.16	N/A
TPM3	ENST00000368531.2	tropomyosin 3	669	1	0	1	0	0	0	0	0	0	hsa-miR-483-3p.1	-0.15	-0.16	N/A
DYRK2	ENST00000344096.3	dual-specificity tyrosine-(Y)-phosphorylation regulated kinase 2	1091	1	0	0	1	3	0	1	2	1	hsa-miR-483-3p.1	-0.15	-0.43	N/A
ETV3	ENST00000368192.4	ets variant 3	37	1	0	1	0	0	0	0	0	1	hsa-miR-483-3p.1	-0.15	-0.15	N/A
AFF1	ENST00000395146.4	AF4/FMR2 family, member 1	28	1	0	1	0	2	0	1	1	1	hsa-miR-483-3p.1	-0.15	-0.4	N/A
RTFDC1	ENST00000395881.3	replication termination factor 2 domain containing 1	15783	1	0	1	0	0	0	0	0	0	hsa-miR-483-3p.1	-0.14	-0.14	N/A
TNPO2	ENST00000425528.1	transportin 2	1620	1	0	1	0	0	0	0	0	0	hsa-miR-483-3p.1	-0.14	-0.14	N/A
AHR	ENST00000242057.4	aryl hydrocarbon receptor	25	1	0	1	0	0	0	0	0	0	hsa-miR-483-3p.1	-0.14	-0.14	N/A
HOMEZ	ENST00000357460.5	homeobox and leucine zipper encoding	100	1	1	0	0	1	0	0	1	0	hsa-miR-483-3p.1	-0.14	-0.33	N/A
CLCN6	ENST00000312413.6	chloride channel, voltage-sensitive 6	227	1	0	1	0	0	0	0	0	2	hsa-miR-483-3p.1	-0.14	-0.14	N/A
TYRO3	ENST00000263798.3	TYRO3 protein tyrosine kinase	70	1	0	1	0	1	0	1	0	3	hsa-miR-483-3p.1	-0.13	-0.14	N/A
ZNF446	ENST00000335841.4	zinc finger protein 446	44	1	0	1	0	0	0	0	0	0	hsa-miR-483-3p.1	-0.13	-0.13	N/A
CXorf56	ENST00000320339.4	chromosome X open reading frame 56	279	1	0	1	0	0	0	0	0	3	hsa-miR-483-3p.1	-0.13	-0.23	N/A
GDF11	ENST00000257868.5	growth differentiation factor 11	847	2	1	1	0	0	0	0	0	1	hsa-miR-483-3p.1	-0.13	-0.39	N/A
MLLT1	ENST00000252674.7	myeloid/lymphoid or mixed-lineage leukemia (trithorax homolog, Drosophila); translocated to, 1	33	1	0	1	0	0	0	0	0	1	hsa-miR-483-3p.1	-0.13	-0.23	N/A
TP73	ENST00000378280.1	tumor protein p73	831	1	0	1	0	0	0	0	0	0	hsa-miR-483-3p.1	-0.13	-0.13	N/A
HNRNPR	ENST00000478691.1	heterogeneous nuclear ribonucleoprotein R	6629	1	0	0	1	0	0	0	0	0	hsa-miR-483-3p.1	-0.12	-0.12	N/A
ITPRIPL1	ENST00000536814.1	inositol 1,4,5-trisphosphate receptor interacting protein-like 1	131	1	0	1	0	0	0	0	0	2	hsa-miR-483-3p.1	-0.12	-0.16	N/A
ATXN1	ENST00000244769.4	ataxin 1	106	1	1	0	0	0	0	0	0	1	hsa-miR-483-3p.1	-0.12	-0.17	N/A
CNIH2	ENST00000528852.1	cornichon family AMPA receptor auxiliary protein 2	158	1	0	1	0	0	0	0	0	0	hsa-miR-483-3p.1	-0.12	-0.12	N/A
COLQ	ENST00000383785.2	collagen-like tail subunit (single strand of homotrimer) of asymmetric acetylcholinesterase	8	1	0	1	0	0	0	0	0	0	hsa-miR-483-3p.1	-0.12	-0.12	N/A
RAB15	ENST00000436278.2	RAB15, member RAS oncogene family	23	1	0	0	1	0	0	0	0	0	hsa-miR-483-3p.1	-0.11	-0.11	N/A
CCDC85C	ENST00000380243.4	coiled-coil domain containing 85C	86	1	0	0	1	0	0	0	0	2	hsa-miR-483-3p.1	-0.1	-0.13	N/A
XPO1	ENST00000401558.2	exportin 1 (CRM1 homolog, yeast)	404	1	0	1	0	0	0	0	0	0	hsa-miR-483-3p.1	-0.1	-0.13	N/A
C17orf85	ENST00000158149.3	chromosome 17 open reading frame 85	718	1	0	1	0	1	0	1	0	2	hsa-miR-483-3p.1	-0.1	-0.3	N/A
SMARCD1	ENST00000394963.4	SWI/SNF related, matrix associated, actin dependent regulator of chromatin, subfamily d, member 1	952	1	0	1	0	1	0	1	0	1	hsa-miR-483-3p.1	-0.1	-0.2	N/A
RGS9BP	ENST00000334176.3	regulator of G protein signaling 9 binding protein	13	1	0	1	0	0	0	0	0	1	hsa-miR-483-3p.1	-0.09	-0.09	N/A
FRMPD4	ENST00000380682.1	FERM and PDZ domain containing 4	25	1	0	1	0	0	0	0	0	2	hsa-miR-483-3p.1	-0.09	-0.12	N/A
EXOC7	ENST00000607838.1	exocyst complex component 7	1483	1	0	1	0	1	0	1	0	1	hsa-miR-483-3p.1	-0.09	-0.15	N/A
ARHGAP44	ENST00000262444.9	Rho GTPase activating protein 44	22	1	0	1	0	0	0	0	0	0	hsa-miR-483-3p.1	-0.09	-0.09	N/A
RP11-766F14.2	ENST00000511828.1	Protein LOC285556	5	1	0	1	0	0	0	0	0	0	hsa-miR-483-3p.1	-0.08	-0.09	N/A
XYLT1	ENST00000261381.6	xylosyltransferase I	159	1	0	0	1	0	0	0	0	0	hsa-miR-483-3p.1	-0.08	-0.08	N/A
KRT77	ENST00000341809.3	keratin 77	5	1	0	1	0	0	0	0	0	1	hsa-miR-483-3p.1	-0.08	-0.08	N/A
TTPAL	ENST00000372906.2	tocopherol (alpha) transfer protein-like	265	1	0	0	1	0	0	0	0	5	hsa-miR-483-3p.1	-0.08	-0.08	N/A
RAB6B	ENST00000285208.4	RAB6B, member RAS oncogene family	669	1	0	0	1	0	0	0	0	2	hsa-miR-483-3p.1	-0.08	-0.09	N/A
SPTSSA	ENST00000298130.4	serine palmitoyltransferase, small subunit A	27	1	0	0	1	1	0	0	1	0	hsa-miR-483-3p.1	-0.08	-0.25	N/A
PLXND1	ENST00000393239.1	plexin D1	211	1	0	1	0	0	0	0	0	0	hsa-miR-483-3p.1	-0.07	-0.07	N/A
SRGAP1	ENST00000355086.3	SLIT-ROBO Rho GTPase activating protein 1	64	1	0	1	0	0	0	0	0	1	hsa-miR-483-3p.1	-0.06	-0.1	N/A
CAPRIN1	ENST00000341394.4	cell cycle associated protein 1	650	1	0	0	1	1	1	0	0	2	hsa-miR-483-3p.1	-0.06	-0.24	N/A
RAB10	ENST00000264710.4	RAB10, member RAS oncogene family	998	1	0	1	0	0	0	0	0	1	hsa-miR-483-3p.1	-0.06	-0.25	N/A
VSIG4	ENST00000455586.2	V-set and immunoglobulin domain containing 4	5	1	0	0	1	0	0	0	0	0	hsa-miR-483-3p.1	-0.05	-0.05	N/A
ZZEF1	ENST00000381638.2	zinc finger, ZZ-type with EF-hand domain 1	83	1	0	1	0	0	0	0	0	1	hsa-miR-483-3p.1	-0.05	-0.07	N/A
KRAS	ENST00000256078.4	Kirsten rat sarcoma viral oncogene homolog	40	1	0	0	1	0	0	0	0	0	hsa-miR-483-3p.1	-0.04	-0.12	N/A
VPS53	ENST00000437048.2	vacuolar protein sorting 53 homolog (S. cerevisiae)	1332	1	0	1	0	2	0	1	1	5	hsa-miR-483-3p.1	-0.04	-0.14	N/A
MTMR3	ENST00000333027.3	myotubularin related protein 3	123	1	0	1	0	1	0	0	1	1	hsa-miR-483-3p.1	-0.03	-0.04	N/A
FRRS1L	ENST00000561981.2	ferric-chelate reductase 1-like	11	1	0	0	1	0	0	0	0	2	hsa-miR-483-3p.1	-0.03	-0.03	N/A
POLR2F	ENST00000442738.2	polymerase (RNA) II (DNA directed) polypeptide F	134	1	0	0	1	0	0	0	0	0	hsa-miR-483-3p.1	-0.02	-0.05	N/A
ROCK1	ENST00000399799.2	Rho-associated, coiled-coil containing protein kinase 1	7	1	0	0	1	0	0	0	0	1	hsa-miR-483-3p.1	-0.02	-0.02	N/A
STK40	ENST00000359297.2	serine/threonine kinase 40	214	1	0	1	0	0	0	0	0	0	hsa-miR-483-3p.1	-0.02	-0.02	N/A
ROBO2	ENST00000461745.1	roundabout, axon guidance receptor, homolog 2 (Drosophila)	22	1	0	0	1	0	0	0	0	0	hsa-miR-483-3p.1	-0.02	-0.02	N/A
KCMF1	ENST00000409785.4	potassium channel modulatory factor 1	1285	1	0	0	1	0	0	0	0	1	hsa-miR-483-3p.1	-0.02	-0.15	N/A
ZNF226	ENST00000588883.1	zinc finger protein 226	327	3	0	3	0	1	0	1	0	1	hsa-miR-483-3p.1	-0.01	-0.49	N/A
SHB	ENST00000377707.3	Src homology 2 domain containing adaptor protein B	1436	1	0	1	0	1	0	1	0	0	hsa-miR-483-3p.1	-0.01	-0.28	N/A
MRPL17	ENST00000288937.6	mitochondrial ribosomal protein L17	1447	1	1	0	0	1*	0	0	0	1	hsa-miR-483-3p.1	-0.01	-0.3	N/A
QSOX1	ENST00000367602.3	quiescin Q6 sulfhydryl oxidase 1	9246	1	0	1	0	1	0	0	1	2	hsa-miR-483-3p.1	0	-0.4	N/A
SMC1A	ENST00000322213.4	structural maintenance of chromosomes 1A	1626	1	1	0	0	0	0	0	0	3	hsa-miR-483-3p.1	0	-0.17	N/A
AHSA2	ENST00000394457.3	AHA1, activator of heat shock 90kDa protein ATPase homolog 2 (yeast)	820	1	0	1	0	0	0	0	0	0	hsa-miR-483-3p.1	0	-0.14	N/A
IER5	ENST00000367577.4	immediate early response 5	11212	1	1	0	0	0	0	0	0	2	hsa-miR-483-3p.1	0	-0.28	N/A
ACOT13	ENST00000537591.1	acyl-CoA thioesterase 13	1489	1	0	0	1	0	0	0	0	1	hsa-miR-483-3p.1	0	-0.02	N/A
SHC3	ENST00000375835.4	SHC (Src homology 2 domain containing) transforming protein 3	18	1	0	1	0	2	1	1	0	1	hsa-miR-483-3p.1	0	-0.19	N/A
